# Supplementary material
Source: PubMed Central journal article supplement (PMC5549647)

# Batch coloring: BeadChip.ID

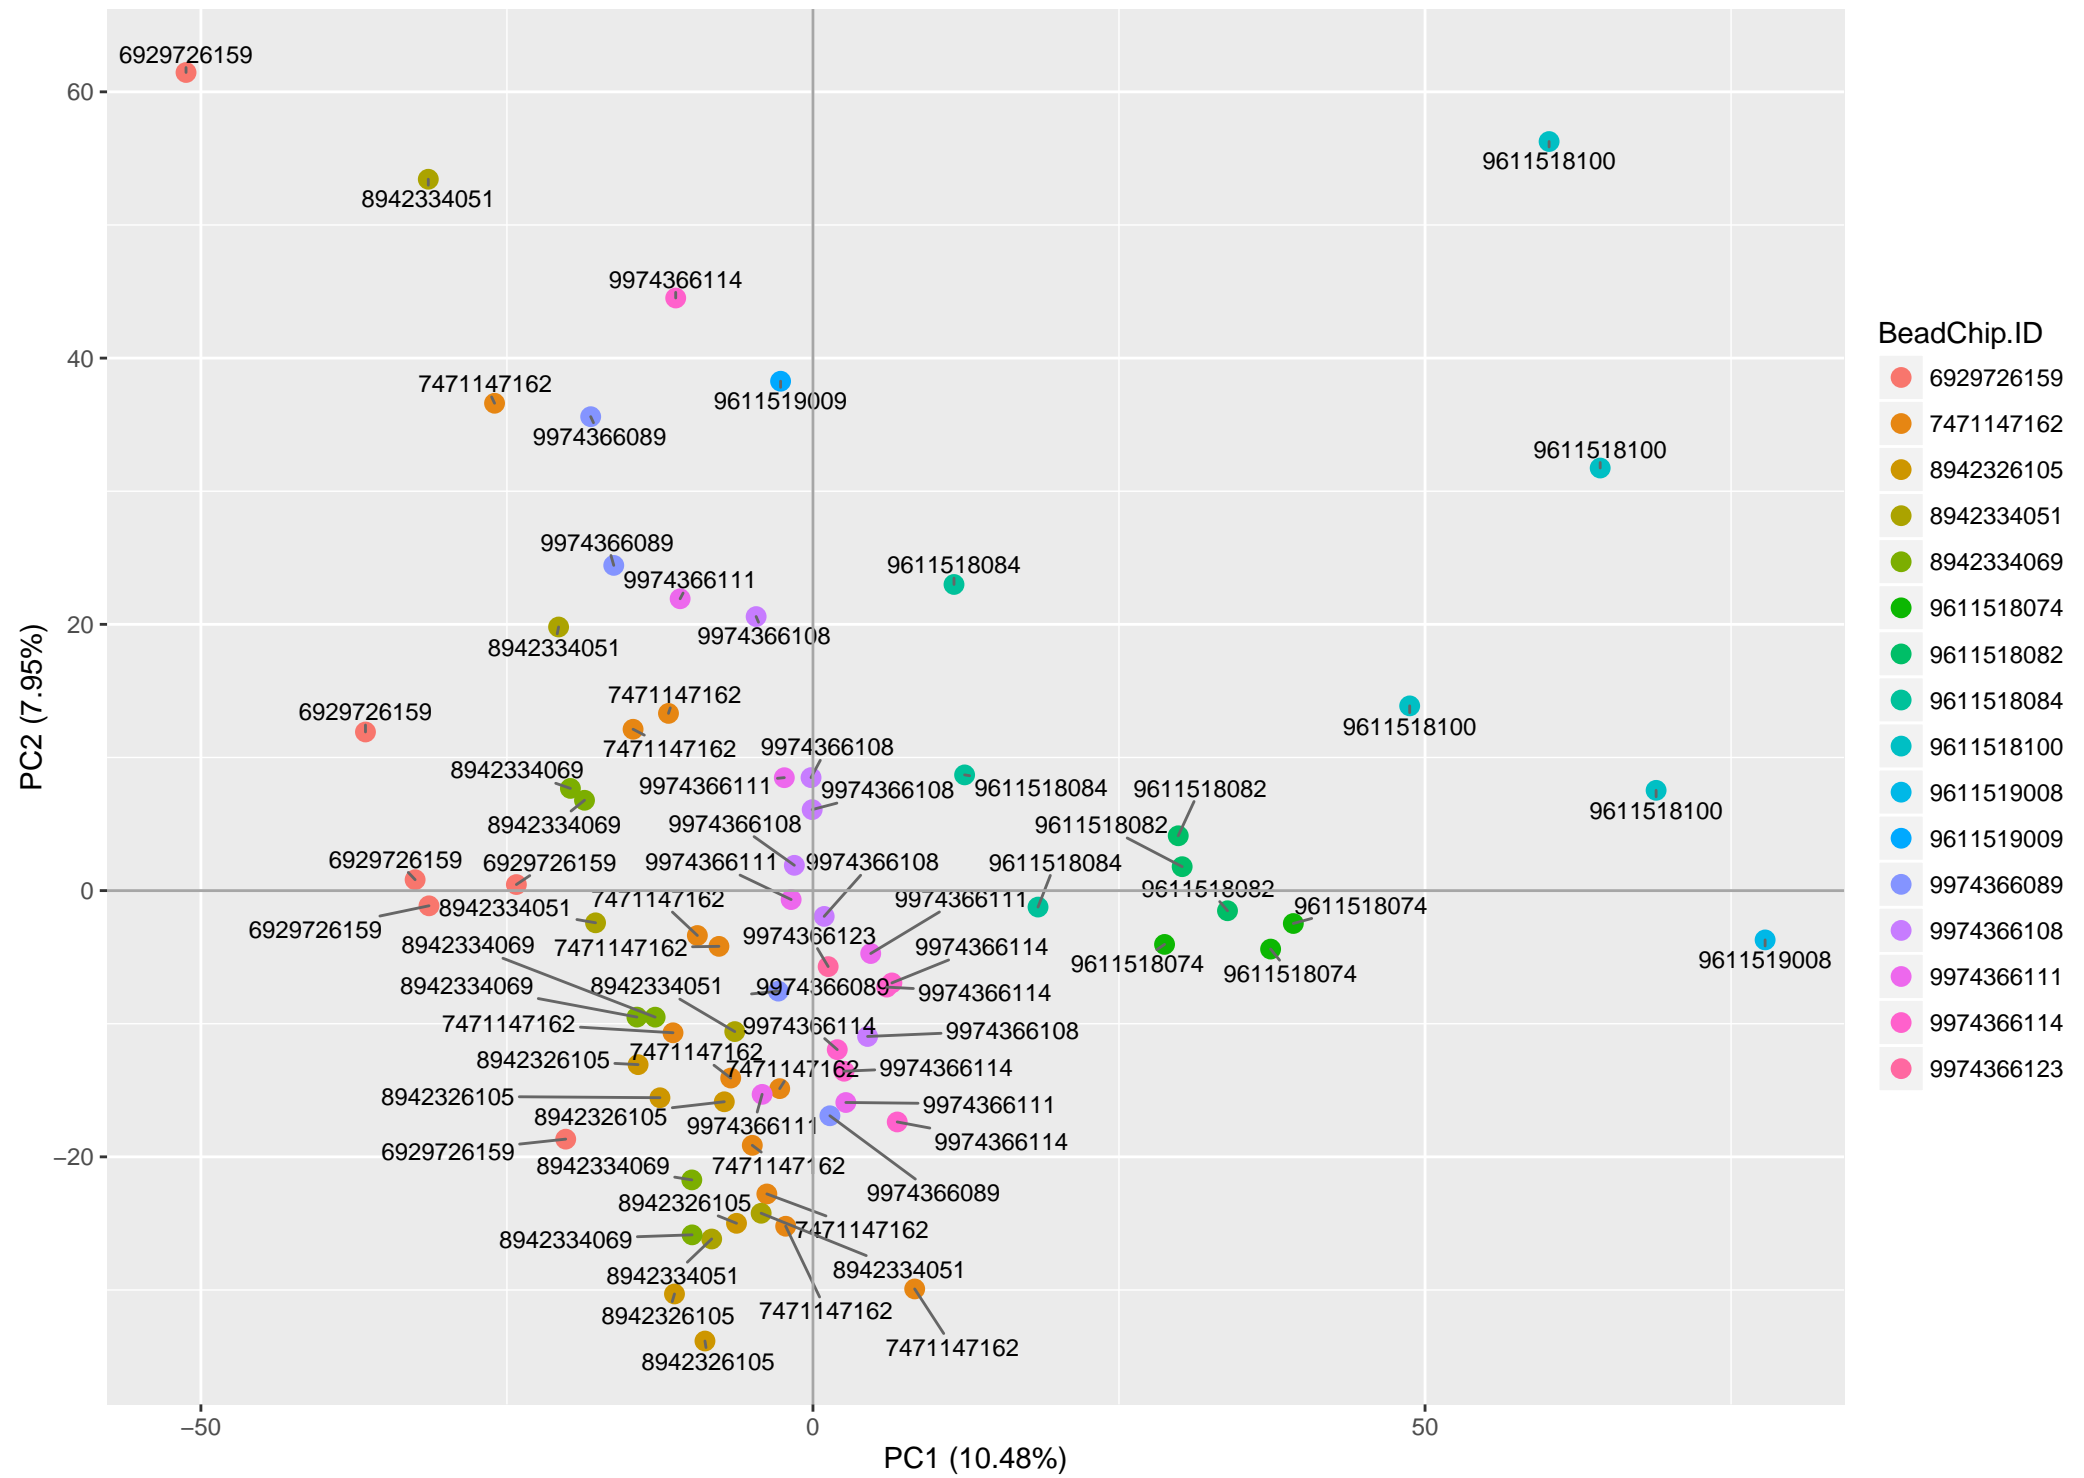

Supplement: epi-09-429-s1.pdf [file epi-09-429-s1.pdf]

# Batch coloring: BeadChip.ID

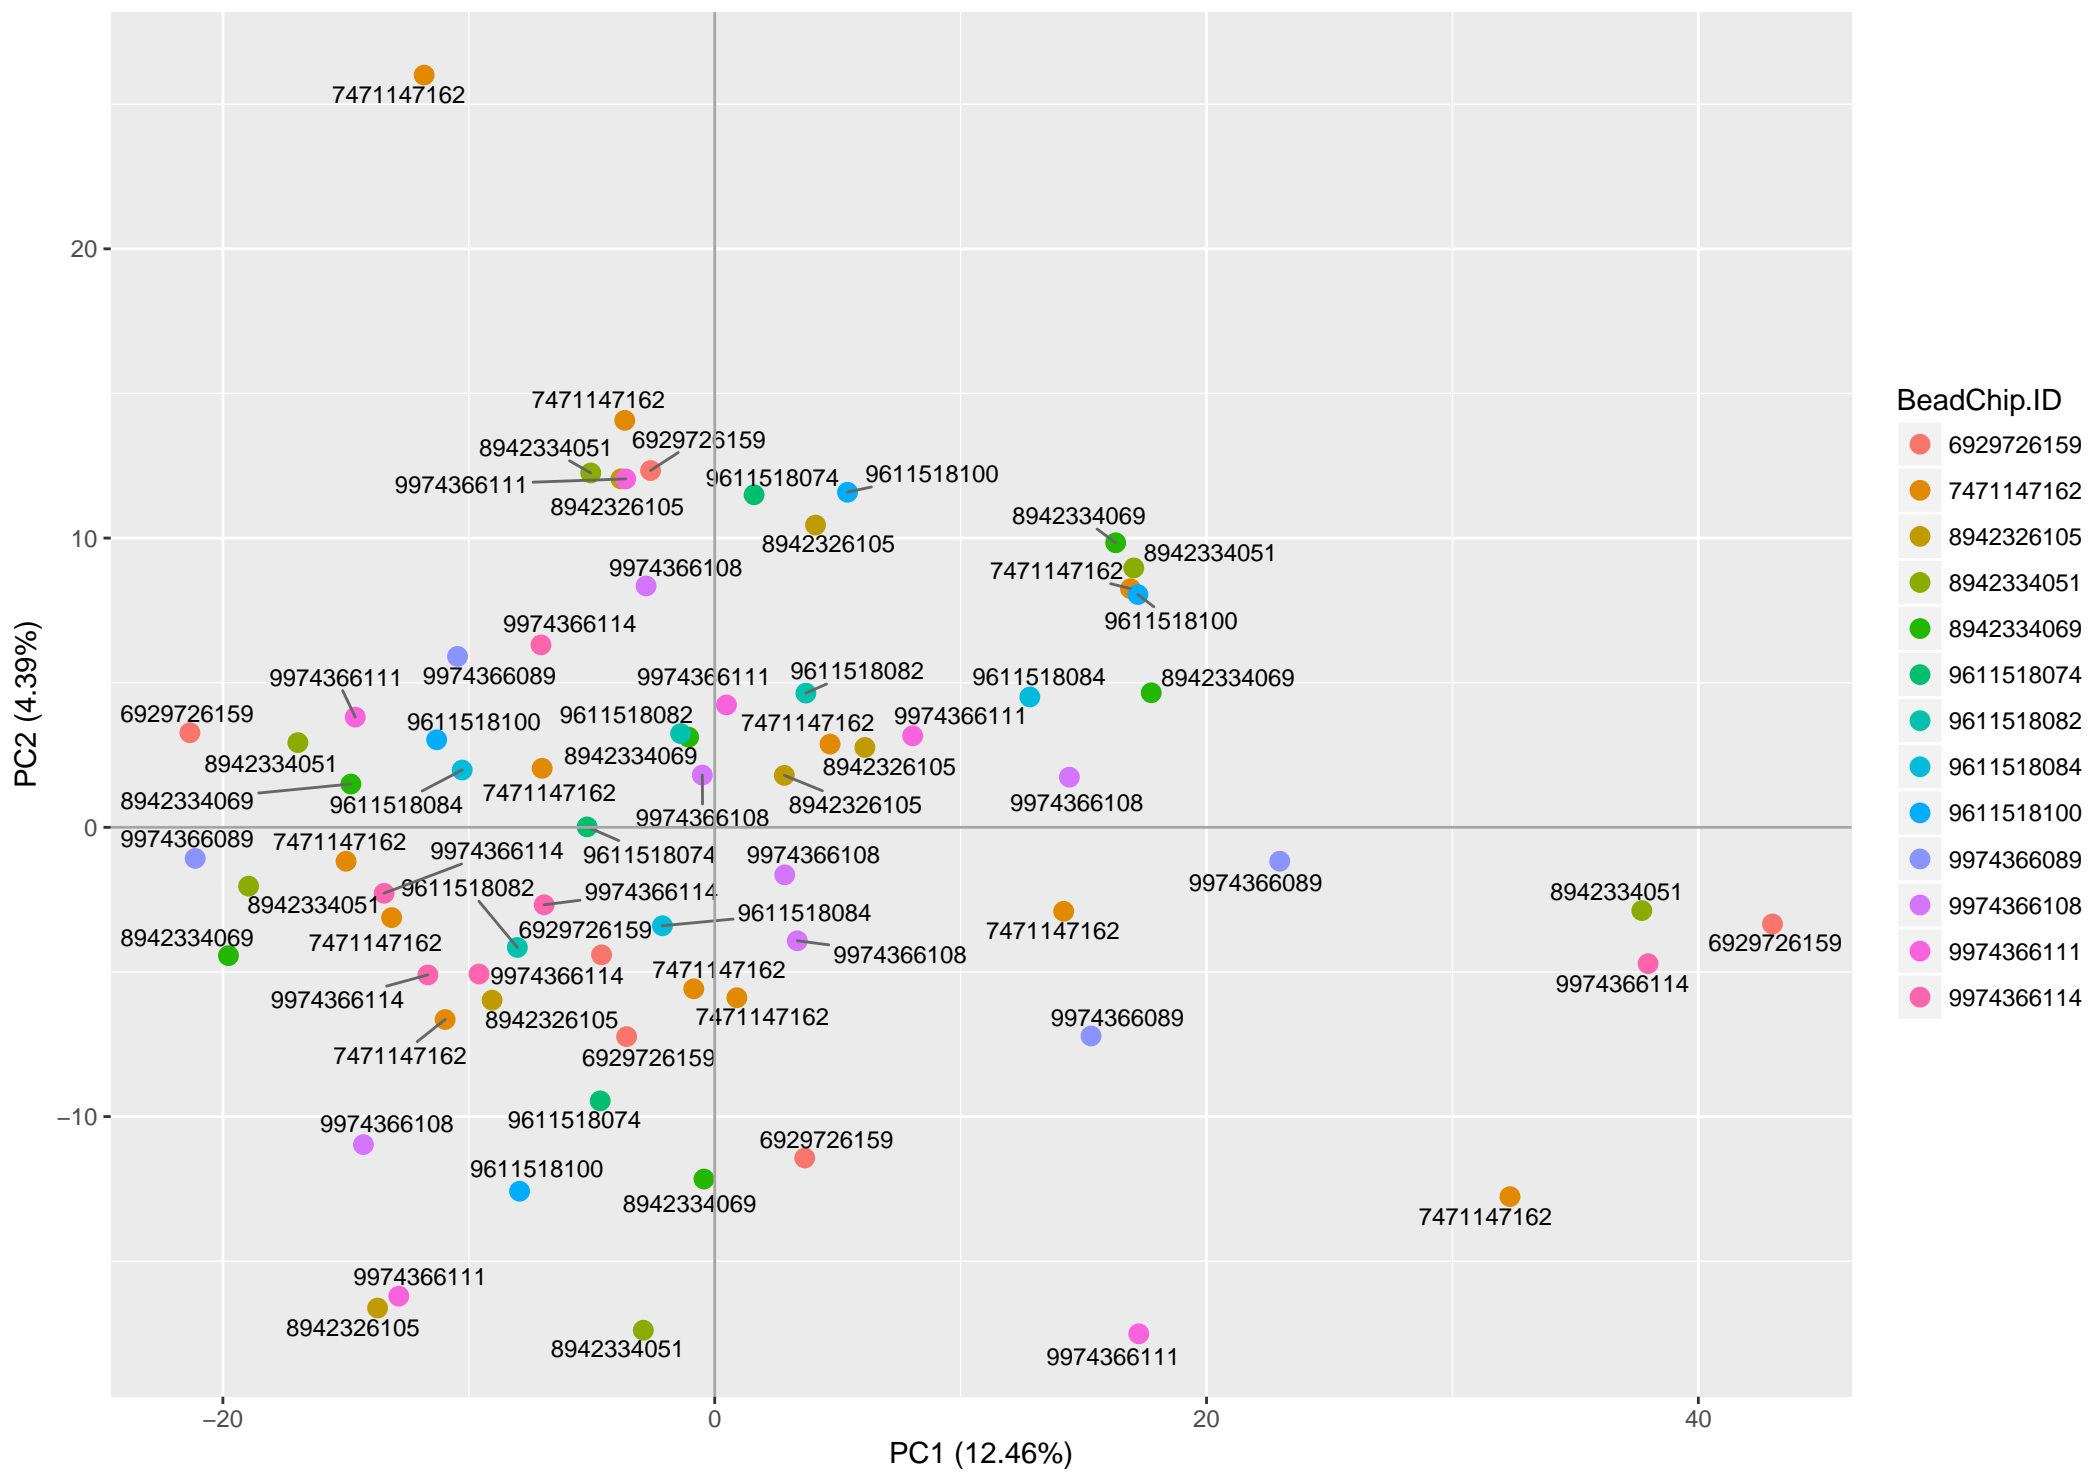

Supplement: epi-09-429-s2.pdf [file epi-09-429-s2.pdf]

# PCA of the regulatory similarities

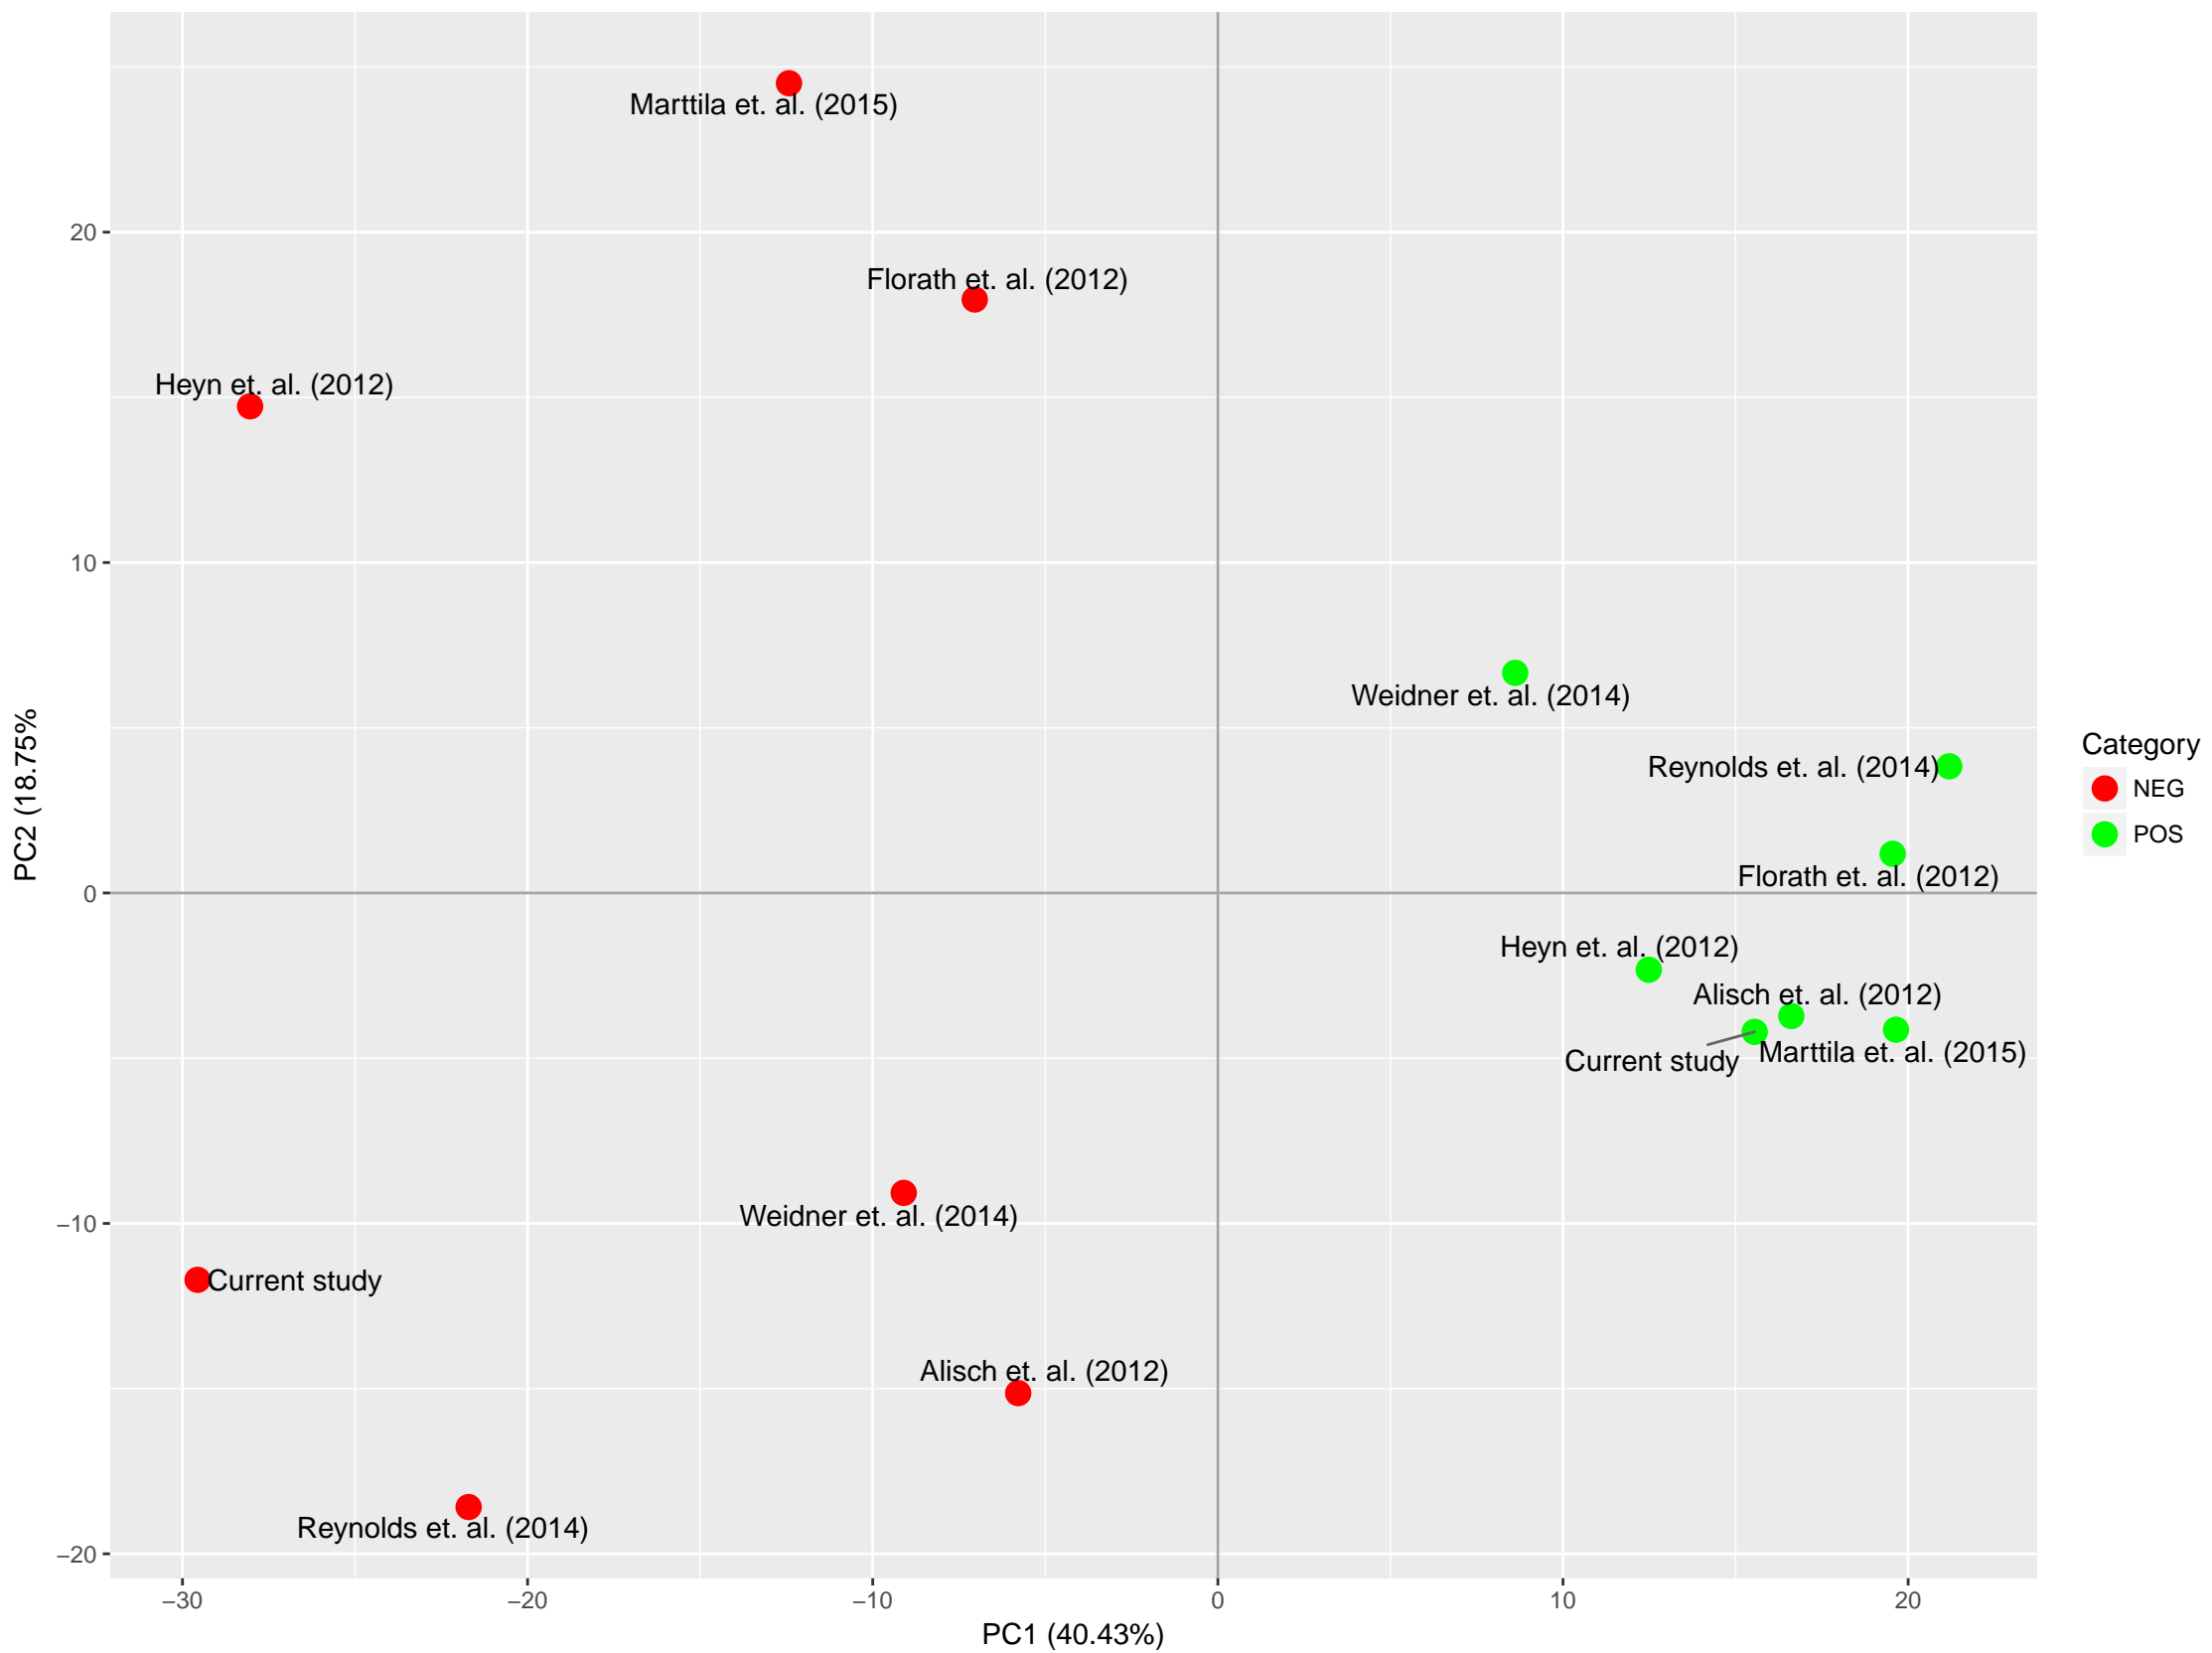

Supplement: epi-09-429-s3.pdf [file epi-09-429-s3.pdf]
